# Supplementary material for: Effect of acute anaerobic performance on zinc alpha 2 glycoprotein, apelin and lipasin levels
Source: PeerJ journal article supplement (doi:10.7717/peerj.18093), 2024-10-24
Supplement: Dataset.zip [file Dataset.zip]

## Sheet: Sayfa1
Age (Years)	Weight (kg)	Height (cm)	Sport Age (Years)	MaxPower	MinPower	AveragePower	FATIQUEINDEX	Rest Lipasin (ng/ml)	10min lipasin (ng/ml)	60min Lipasin (ng/ml)	24hours Lipasin (ng/ml)	Rest Apelin (ng/ml)	10min Apelin (ng/ml)	60min Apelin (ng/ml)	24hours Apelin (ng/ml)	Rest ZAG (ng/ml)	10min ZAG (ng/ml)	60min ZAG (ng/ml)	24hours ZAG (ng/ml)
23	89	184	10	909.91	576.49	635.13	28.53	0.052	0.064	0.103	0.117	0.024	0.035	0.046	0.045	0.445	1.992	1.355	0.624
23	66	168	8	485.94	301.3	359.1	14.15	0.1	0.078	0.146	0.172	0.033	0.323	0.121	0.013	1.004	1.668	2.012	0.288
17	66	159	8	552.41	374.31	412.14	16.55	0.139	0.028	0.09	0.117	0.017	0.035	0.024	0.07	0.614	2.327	0.899	1.387
22	83	183	10	960.83	585.21	637.66	30.93	0.25	0.269	0.286	0.297	0.039	0.096	0.04	0.187	0.957	2.59	0.541	0.724
17	60	168	8	755.09	519.73	549.61	25.04	0.122	0.081	0.213	0.081	0.168	0.097	0.166	0.176	1.913	3.176	2.815	2.251
17	82	190	6	659.68	453.6	470.72	19.21	1.11	1.111	0.709	0.846	0.592	0.097	0.143	0.062	0.998	1.758	0.385	0.716
18	70	172	9	572.74	363.3	409.14	16.98	0.225	0.071	0.098	0.112	0.083	0.069	0.047	0.11	2.719	2.916	2.405	2.636
23	70	173	3	638.88	439.5	483.86	19.62	0.239	0.108	0.368	0.074	0.083	0.086	0.11	0.062	1.481	3.191	2.225	1.967
17	66	176	9	578.33	429.76	414.78	17.08	0.14	0.192	0.153	0.102	0.02	0.059	0.076	0.097	1.282	3.209	1.374	1.236
20	67	172	10	590.51	412.06	445.4	17.91	0.073	0.214	0.11	0.11	0.054	0.058	0.027	0.029	1.886	2.914	2.423	1.717
17	72	183	4	616.52	412.44	472.4	18.74	0.126	0.125	0.155	0.076	0.022	0.023	0.039	0.041	1.357	3.137	0.983	0.891
17	67	175	8	573.71	405.79	409.09	16.96	0.198	0.114	0.168	0.293	0.079	0.204	0.066	0.059	1.623	2.537	0.796	1.277
17	60	169	3	414.08	266.41	306.45	11.79	0.402	0.348	0.283	0.224	0.066	0.114	0.091	0.087	2.005	2.494	2.223	1.558
18	62	173	4	593.21	356.94	429.48	18.42	0.459	0.28	0.043	0.118	0.059	0.069	0.066	0.078	1.482	3.198	2.29	2.362
22	80	185	10	725.87	377.37	491.64	22.35	0.358	0.284	0.123	0.141	0.18	0.163	0.09	0.075	3.018	3.018	0.892	0.441
22	74	183	10	975.15	553.86	639.57	32.79	0.13	0.473	0.149	0.488	0.084	0.098	0.093	0.091	3.244	3.195	2.186	2.866
17	66	178	5	585.06	357.95	396.14	17.56	0.192	0.041	0.114	0.019	0.04	0.027	0.092	0.034	0.88	1.795	1.148	1.104
17	71	177	5	464.73	388.89	367.28	12.75	0.175	0.141	0.097	0.213	0.089	0.069	0.03	0.039	1.864	3.196	1.813	0.677
